# Supplementary material
Source: ML conference proceedings conference paper supplement (https://openreview.net/forum?id=HIHWYOAKgYz)

Training Losses of Semantic Segmentation

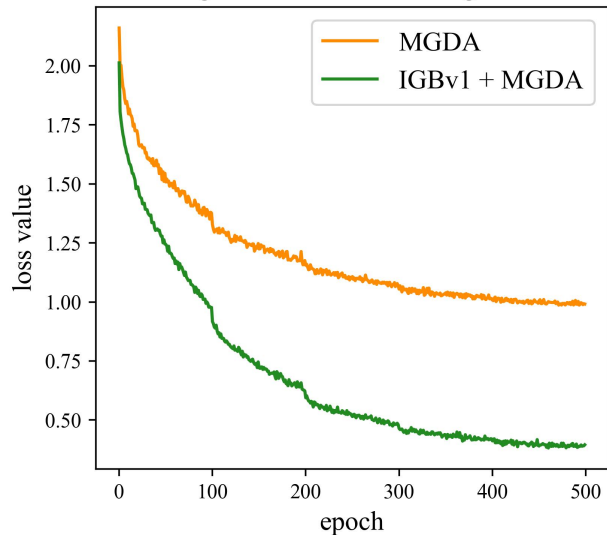

Training Losses of Depth Estimation

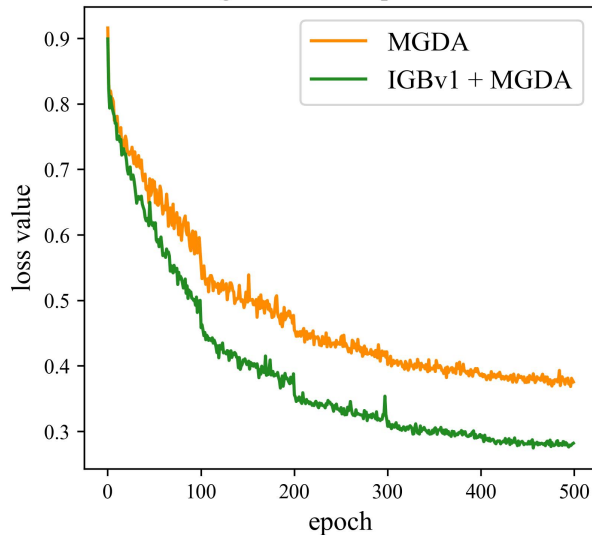

Training Losses of Surface Normal Prediction

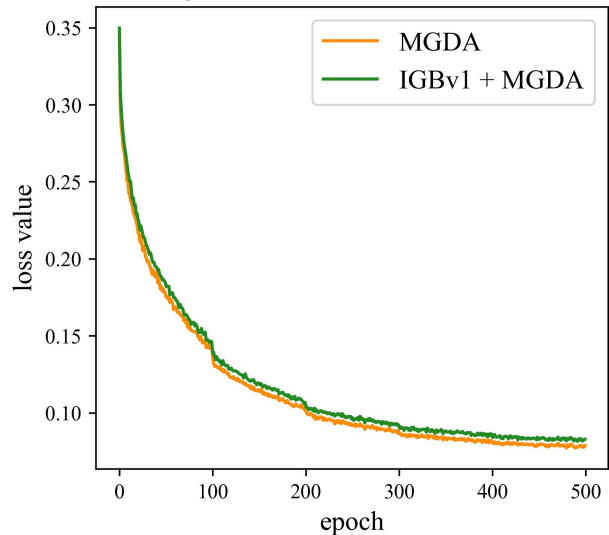

Supplement: supplementary_material [file attachment]
